# Supplementary material for: Stretchable, adhesive and ultra-conformable elastomer thin films
Source: Royal Society of Chemistry journal article supplement (doi:10.1039/c6sm01242f), 2016-01-01
Supplement: c6sm01242f6.pdf [file c6sm01242f6.pdf]

*Supporting Information*

Stretchable, adhesive and ultra-conformable elastomer thin films

*Nobutaka Sato,<sup>a</sup> Atsushi Murata,<sup>b</sup> Toshinori Fujie,<sup>\*c,d</sup> and Shinji Takeoka<sup>\*a</sup>*

<sup>a</sup>Department of Life Science and Medical Bioscience, Graduate School of Advanced Science and Engineering, Waseda University (TWIns), 2-2 Wakamatsu-cho, Shinjuku, Tokyo 162-8480, Japan., <sup>b</sup>Institute for Nanoscience and Nanotechnology, Waseda University, 513 Waseda Tsurumaki-cho, Shinjuku, Tokyo 162-0041, Japan., <sup>c</sup>Waseda Institute for Advanced Study, Waseda University, TWIns, 2-2 Wakamatsu-cho, Shinjuku-ku, Tokyo, 162-8480 Japan., <sup>d</sup>Japan Science and Technology Agency, PRESTO, 4-1-8 Honcho, Kawaguchi, Saitama 332-0012, Japan.

Contact Information: [t.fujie@aoni.waseda.jp](mailto:t.fujie@aoni.waseda.jp) / [takeoka@waseda.jp](mailto:takeoka@waseda.jp)

## Supporting Figures

**Table S1.** Supplier information in the tape test section

| Product name                       | Supplier           | Adhesive strength (N/cm) |
|------------------------------------|--------------------|--------------------------|
| Cellophane tape <sup>®</sup> CT-24 | Nichiban Co., Ltd. | 4.01                     |
| 214-3MNE                           |                    | 2.59                     |
| 2142                               |                    | 1.18                     |
| 244                                |                    | 1.06                     |
| 2305                               | 3M Japan Co., Ltd. | 0.78                     |
| 331                                |                    | 0.29                     |
| 332                                |                    | 0.22                     |
| 9491                               |                    | 0.18                     |
| 945                                | Teraoka Co., Ltd.  | 0.08                     |

**Table S2.** Mechanical properties of the SBS thin films with different thicknesses by a tensile test

| Polymer | Thickness (nm) | Tensile strength (MPa) | Elongation (%) | Young's modulus (MPa) |
|---------|----------------|------------------------|----------------|-----------------------|
| SBS     | $212 \pm 16$   | $0.96 \pm 0.05$        | $146 \pm 8$    | $5.7 \pm 1.2$         |
| SBS     | $690 \pm 79$   | $0.99 \pm 0.02$        | $186 \pm 22$   | $4.9 \pm 0.8$         |

**Table S3.** Static contact angle and work of adhesion of PS and SBS thin films with different thicknesses

| Polymer | Thickness (nm) | Contact angle (deg.) | Work of adhesion between water and thin films (mJ/m <sup>2</sup> ) |
|---------|----------------|----------------------|--------------------------------------------------------------------|
| PS      | 127±10         | 77±2                 | 89                                                                 |
| PS      | 217±5          | 76±1                 | 89                                                                 |
| PS      | 697±7          | 78±2                 | 88                                                                 |
| SBS     | 212±16         | 82±1                 | 83                                                                 |
| SBS     | 690±79         | 83±1                 | 82                                                                 |

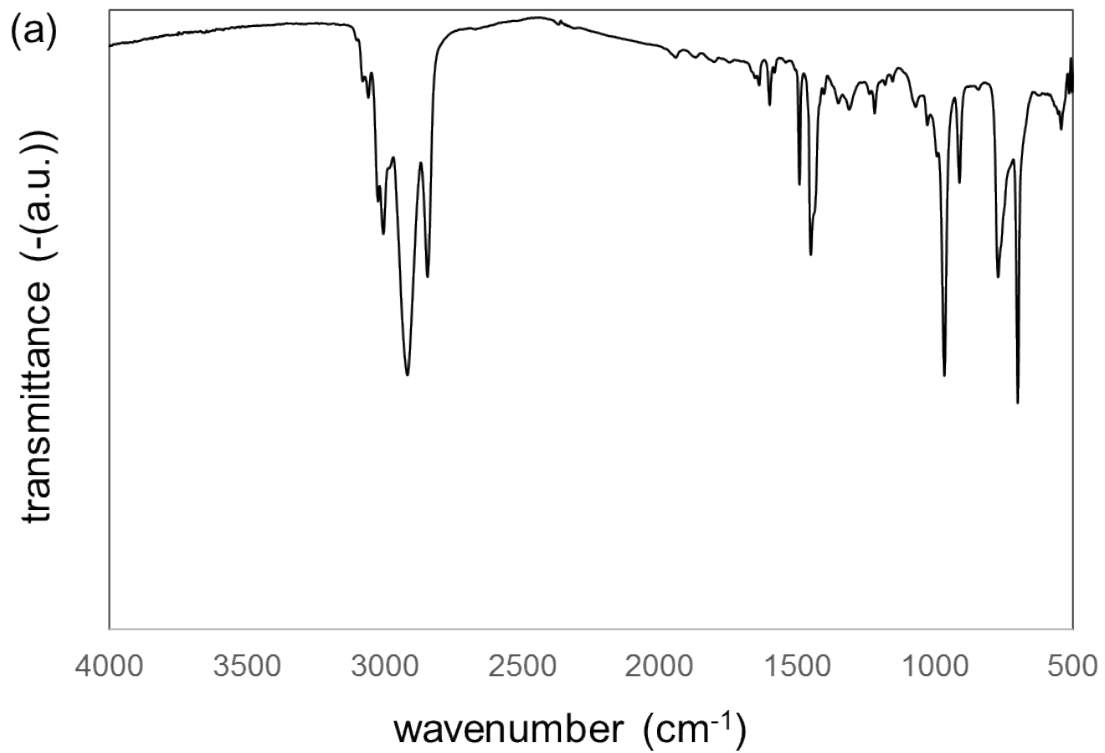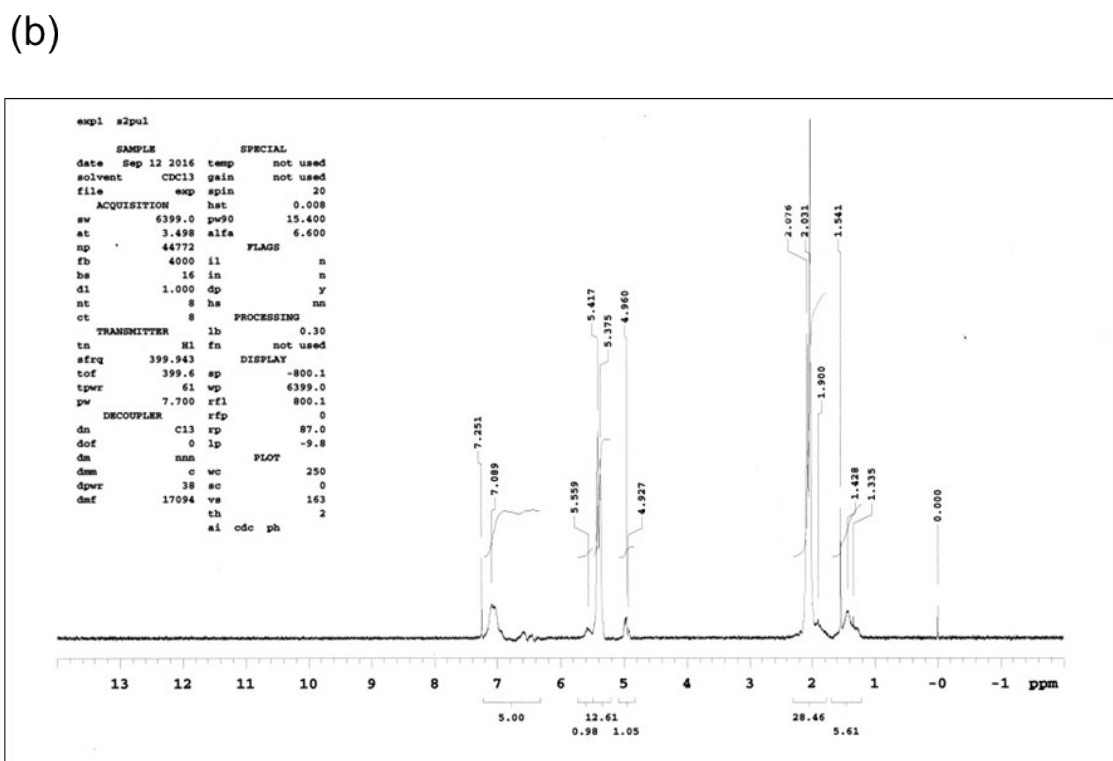

**Figure S1.** FT/IR and NMR spectra of SBS

(a) SBS was dissolved in chloroform (20 mg/mL). The SBS solution dropped to NaCl substrate and dried at room temperature. Then, FT/IR spectra of SBS was measured by IR spectroscopy (FT/IR-4100, JASCO Corp., Tokyo, Japan). The peaks at 2843 – 3059  $\text{cm}^{-1}$  are characteristic of aliphatic and aromatic C-H stretching. The band at 967  $\text{cm}^{-1}$  corresponds to C-H out of plane bending vibrations and 694  $\text{cm}^{-1}$  to C=C stretching vibration. (b) SBS was dissolved in  $\text{CDCl}_3$  (20 mg/mL).  $^1\text{H}$  NMR spectra of SBS was recorded using OXFORD MMR AS 400.  $^1\text{H}$  NMR (400 MHz,  $\text{d-CDCl}_3$ ):  $\delta$  1.34 – 1.43 (- $\text{CH}_2$ -, 4H), 2.03 (- $\text{CH}_2$ -, 4H), 4.97(- $\text{CH}_2$ -, 2H), 5.41 (-CH-, 2H), 5.56 (-CH-, 1H), 6.57 (ArH, 2H), 7.09 (ArH, 3H).

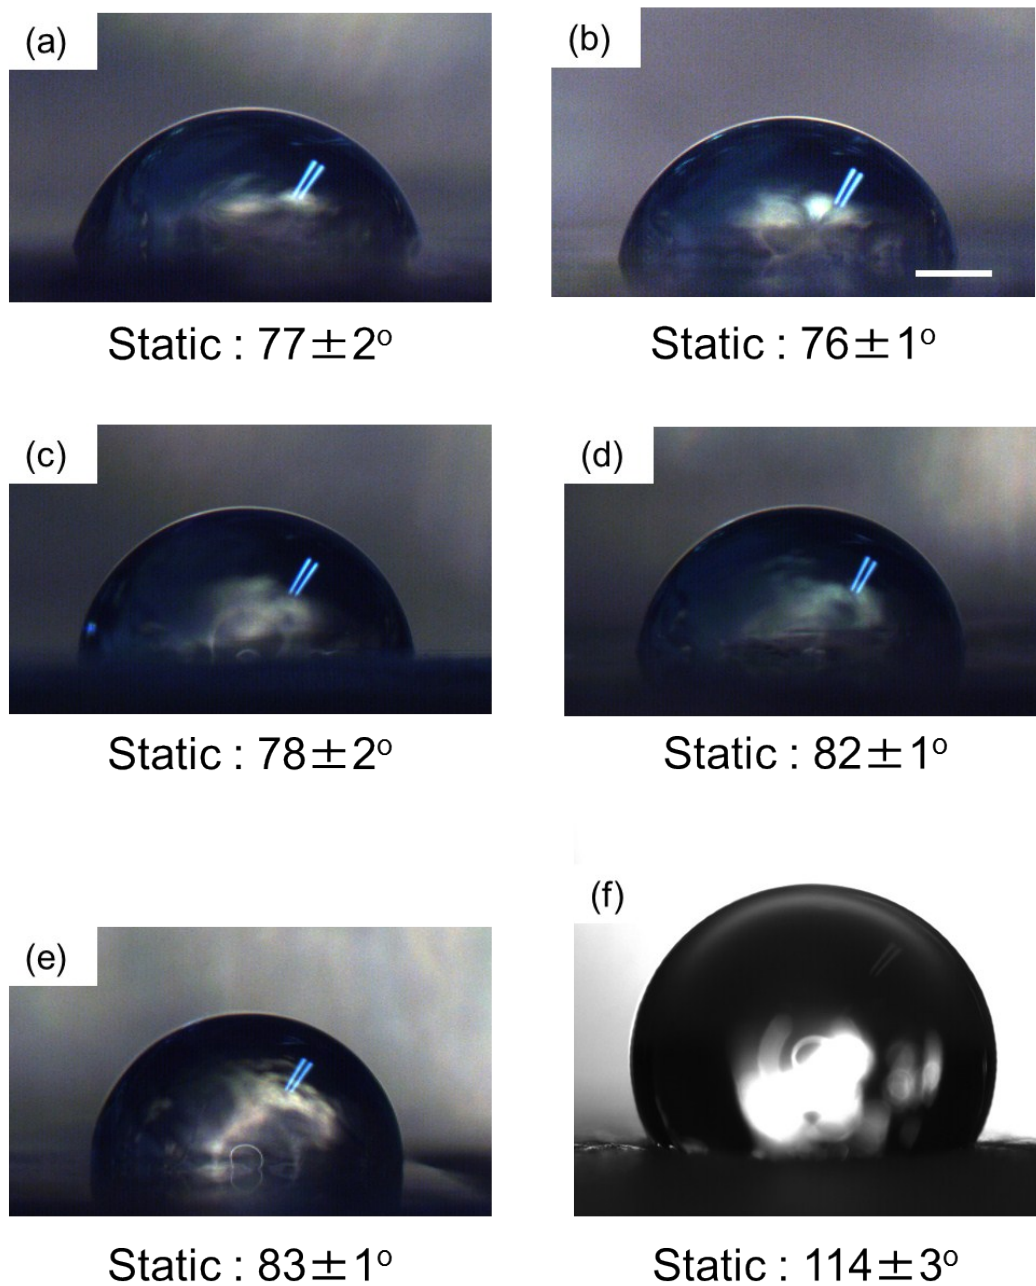

**Figure S2.** Contact angles of PS thin films with thicknesses of 127 nm (a), 217 nm (b), and 697 nm (c), and SBS thin films with thicknesses of 212 nm (d) and 690 nm (e) on SiO<sub>2</sub> substrates. Contact angle of the artificial skin model (f) scale bar: 500 μm.

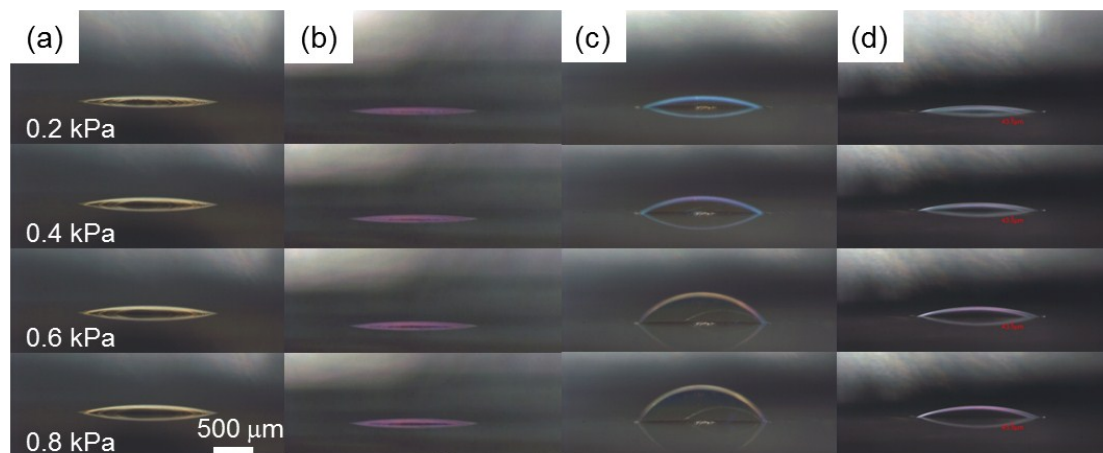

**Figure S3.** Sequential cross-sectional views of the deflection of the PS thin films with thicknesses of 127 nm (a) and 217 nm (b), and the SBS thin films with thicknesses of 212 nm (c) and 690 nm (d).



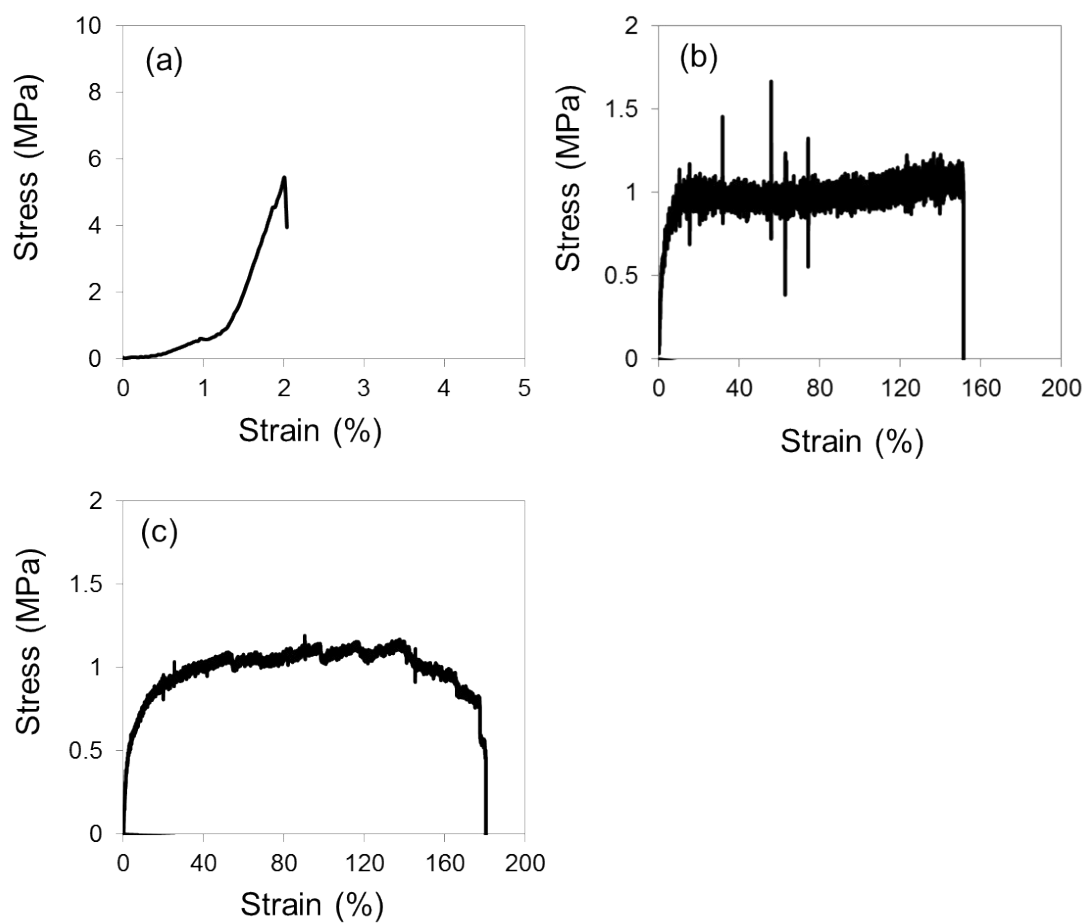

**Figure S4.** Evaluation of mechanical properties of the thin films by a tensile test. Stress-strain curve by tensile test of the PS thin films with thicknesses of 697 nm (a), and the SBS thin films with thicknesses of 212 nm (b) and 690 nm (c).

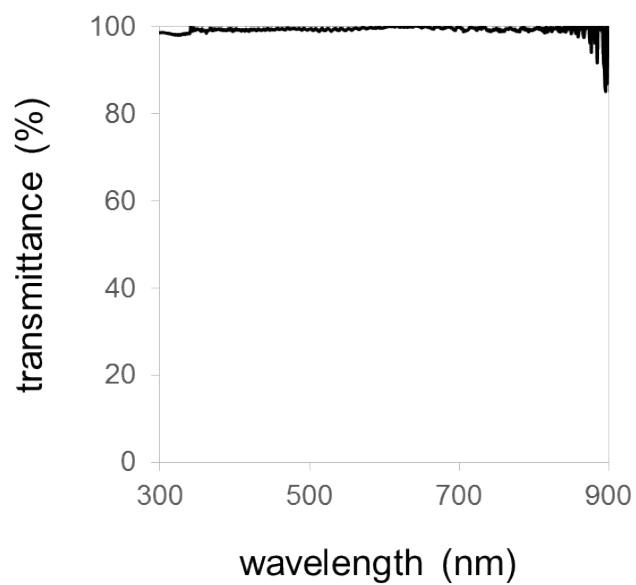

**Figure S5.** Transmittance of SBS thin film with a thickness of 690 nm using an ultraviolet-visible absorption spectrophotometer.

## Supporting Movies

**Movie S1.** SBS thin film prepared by a gravure-coating method with a PVA sacrificial layer to release the thin film on the water. Stretching of a 212 nm-thick SBS thin film ( $3\text{ cm} \times 3\text{ cm}$ ). Paper tapes were attached onto both sides of the thin film to capture the thin film with tweezers.

**Movie S2.** Example of a tensile test ( $\times 32$  speed). A 690 nm-thick SBS thin film was elongated by a tensile tester. Tensile speed: 10 mm/min

**Movie S3.** A cover glass ( $2.2\text{ cm} \times 2.2\text{ cm}$ , 0.12 mm thick) was smashed with a hammer (a). Cover glasses covered with 697 nm PS (b) and 690 nm SBS (c) thin films were smashed with a hammer in the same way as (a).
